# Supplementary material for: An efficient blue electro-fluorescence material with high electron and balanced carrier mobilities based on effective π-stacking between acceptors
Source: Royal Society of Chemistry journal article supplement (doi:10.1039/d3qo01253k), 2023-01-01
Supplement: d3qo01253k1.pdf [file d3qo01253k1.pdf]

## Supporting Information

### **Efficient Blue Electro-fluorescence Material with High Electron and Balanced Carrier Mobilities Based on Effective $\pi$ -stacking Between Acceptors**

*Mizhen Sun, Chenglin Ma, Mingliang Xie, Lizhi Chu, Xin Wang, Qikun Sun, Wenjun Yang, and Shanfeng Xue\**

M. Sun, C. Ma, M. Xie, L. Chu, X. Wang, Q. Sun, Prof. W. Yang, Prof. S. Xue

Key Laboratory of Rubber-Plastics of the Ministry of Education, School of Polymer Science & Engineering, Qingdao University of Science and Technology, Qingdao 266042, P. R. China.

E-mail: sfxue@qust.edu.cn

### **Contents**

**SI-1 General Methods**

**SI-2 Detailed synthesis route**

**SI-3 Supporting data**

## SI-1 General Methods

### SI.1 Materials

All raw materials involved in the synthesis process were purchased from Aldrich Chemical Co. or Energy Chemical Co., China. The organic and metallic materials for transporting layers in OLEDs fabrication were purchased from P-OLED (Shanghai) Technology CO., LTO. Tetrahydrofuran (THF) was distilled over metallic sodium over calcium hydride before use. The other organic solvents and reagents were all commercially available analytical-grade products and used as received without further purification.

### SI.2 Measurements

$^1\text{H}$  and  $^{13}\text{C}$  NMR spectra were recorded on a Mercury 500 spectrometer. MALDI-TOF-MS mass spectra were measured using an AXIMA-CFRTM plus instrument. The dates of thermal gravimetric analysis (TGA) are from Perkin-Elmer thermal analysis system with the temperature of 50-800 °C under a heating rate of 10 °C /min and the nitrogen atmosphere. The dates of Differential scanning calorimetry (DSC) are from NETZSCH (DSC-204) instrument with the temperature of 50-500 °C at a heating rate of 10 °C /min and a nitrogen flow rate of 80 mL/min. UV-vis absorption spectra were measured on a Hitachi U-4100 spectrophotometer. Fluorescence measurements, low temperature fluorescence spectrum and low temperature phosphorescence spectrum were measured on a Hitachi F-4600 spectrophotometer. Cyclic voltammetry (CV) analysis of the materials was recorded on a three-electrode cell with tetra-n-butyl-ammonium hexafluorophosphate (TBAPF<sub>6</sub>, 0.1 m in acetonitrile) as the supporting electrolyte. Two platinum wires were used as counter electrode and reference electrode. The scan rate is 100 mV/s, and all the potentials were corrected to the ferrocene/ferrocene + (Fc/Fc<sup>+</sup>) standard under room temperature. The oxidation curve is obtained by dissolving the product and electrolyte in dichloromethane (DCM), and the reduction curve is obtained in N, N-Dimethylformamide (DMF). The lifetimes of solutions were measured on an Edinburgh FLS-980 spectrometer with an EPL-375 optical laser. Photoluminescence quantum yield was recorded using an FLS980 spectrometer.

### SI.3 Device fabrication

ITO-coated glass with a sheet resistance of 15-20  $\Omega$  square<sup>-1</sup> was used as the substrate. Before device fabrication, the ITO glass substrates were cleaned with acetone, Hellmanex<sup>TM</sup> III and deionized water, dried 12 h in an oven at 80 °C, the substrates were treated by O<sub>2</sub> plasma for 7 minutes to improve the hole injection ability of ITO. Finally transferred to a vacuum deposition system with a pressure of  $< 1.6 \times 10^{-4}$  Pa. The current-voltage-brightness characteristics were measured by using a Keithley source measurement unit (Keithley 2450 and LS-160), EL spectra

were measured with Flame-S (Serial Number: FLMS16791, Range: > 350 nm). EQEs were calculated from the luminance, current density, and EL spectrum, all the results were measured in the forward-viewing direction without using any light out-coupling technique. The evaporation method for carrier mobility is the same as that for device evaporation, and the testing method is the space charge limited current method (SCLC).

## SI-2 Detailed synthesis route

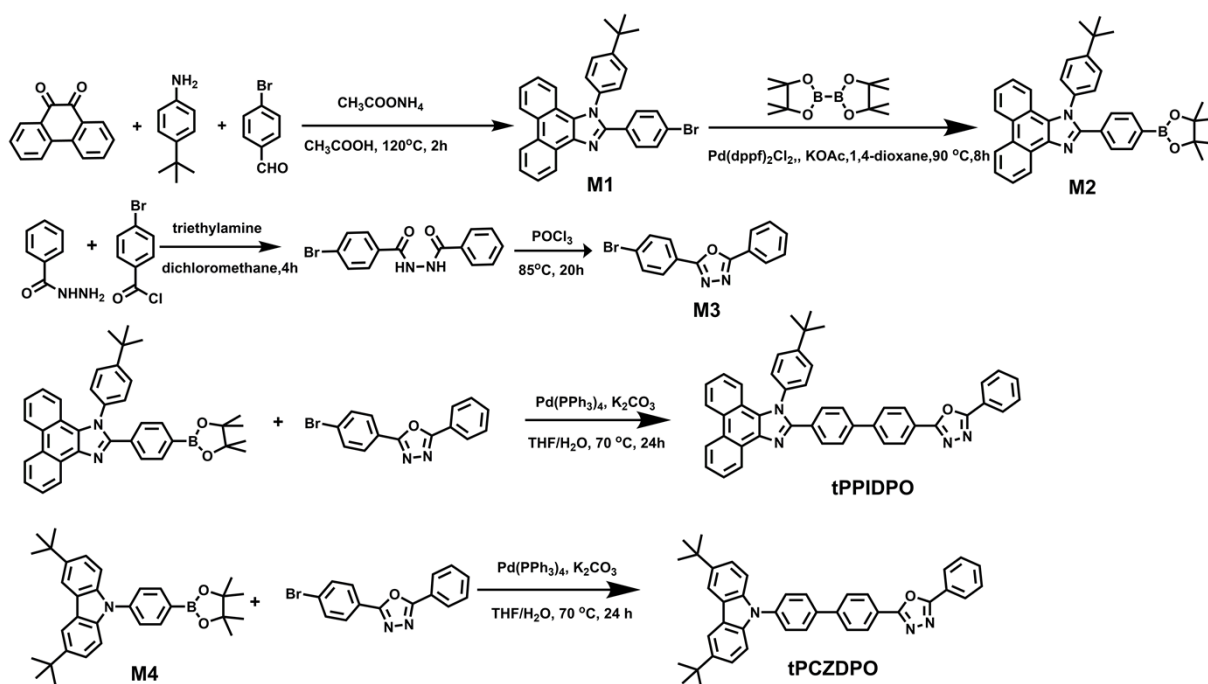

**Scheme. S1** Detailed molecular synthesis routes of Tppidpo and tPCZDPO.

### Synthesis of 2-(4-bromophenyl)-1-(4-(*tert*-butyl)phenyl)-1*H*-phenanthro[9,10-*d*]imidazole (M1) :

A mixture of phenanthrene-9,10-dione (2.00 g, 9.61 mmol), 4-(*tert*-butyl)aniline (5.74 g, 38.44 mmol), 4-bromobenzaldehyde (1.78 g, 9.61 mmol), ammonium acetate (3.70 g, 48.03 mmol), and acetic acid (30 mL) was refluxed for 2 h under nitrogen. After cooling down, the solid product was filtrated and washed with water/acetic acid (1:1; v/v). The collected solids were dissolved in  $\text{CH}_2\text{Cl}_2$  and dried in  $\text{MgSO}_4$ , purified by thin layer chromatography, and the white solid product (4.27 g, 88.0 %) was obtained.

### Synthesis of 1-(4-(*tert*-butyl)phenyl)-2-(4-(4,4,5,5-tetramethyl-1,3,2 dioxaborolan-2-yl)phenyl)-1*H*-phenanthro[9,10-*d*]imidazole (M2):

A solution of 2-(4-bromophenyl)-1-(4-(*tert*-butyl)phenyl)-1*H*-phenanthro[9,10-*d*]imidazole (4.00 g, 7.91 mmol), 4,4,4',4',5,5,5',5'-octamethyl-2,2'-bi(1,3,2-dioxaborolane) (2.41 g, 9.50 mmol), PdCl<sub>2</sub>(dppf) (0.17 g, 0.24 mmol) and KOAc (2.33 g, 23.74 mmol) in degassed 1, 4-dioxane (50 mL) was stirred at 90 °C for 8 hours. The reaction was quenched by deionized water, and the resulting mixture was washed with dichloromethane. The organic layers were collected, dried with anhydrous magnesium sulphate, and concentrated in vacuum. It was purified via silica gel chromatography by petroleum ether/dichloromethane to give the desired compound as a white solid (3.50 g, 80 %).

**Synthesis of 2-(4-bromophenyl)-5-phenyl-1,3,4-oxadiazole (M3):**

4-Bromo-benzoic chloride (3.63 g, 16.5 mmol) in dichloromethane (25 mL) was added dropwise into a solution of benzoyl hydrazine (2.25 g, 16.5 mmol) and triethylamine (3 mL) in dichloromethane (25 mL). The resulting mixture was stirred for 4 h at room temperature and then washed with water. The organic phase separated was evaporated to remove the solvent. Then the solution of the residue in POCl<sub>3</sub> was heated at 85 °C for 20 h. After the solvent was removed under reduced pressure, the residue was dissolved into dichloromethane and washed with water. The organic phase separated was dried over MgSO<sub>4</sub> and the solvent was evaporated. The crude product was purified by recrystallization from hexane. (4.57 g, 92.0 %).

**Synthesis of 2-(4'-(1-(4-(*tert*-butyl)phenyl)-1*H*-phenanthro[9,10-*d*]imidazol-2-yl)-[1,1'-biphenyl]-4-yl)-5-phenyl-1,3,4-oxadiazole (tPPIDPO):**

M2 (4.40 g, 7.97 mmol), M3 (2.00 g, 6.64 mmol), potassium carbonate (1.38 g, 9.96 mmol), tetrahydrofuran (50 mL) and deionized water (10 mL), with Pd(PPh<sub>3</sub>)<sub>4</sub> (0.31 g, 0.27 mmol) acting as catalyst was refluxed at 70 °C for 24 h under nitrogen. After the mixture was cooled down, 40 mL deionized water was added to the resulting solution and the mixture was extracted with dichloromethane for several times. The organic phase was dried over anhydrous magnesium sulphate. After filtration and solvent evaporation, the given residue was purified through silica gel column chromatography using ethyl acetate/dichloromethane as eluent to give the product as white solid (3.44 g, 80.0 %). <sup>1</sup>H NMR (500 MHz, Chloroform-*d*) δ 8.90 (d, J = 7.9 Hz, 1H), 8.76 (d, J = 8.5 Hz, 1H), 8.70 (d, J = 8.3 Hz, 1H), 8.17 (td, J = 8.5, 2.1 Hz, 4H), 7.78 – 7.69 (m, 5H), 7.69 – 7.60 (m, 3H), 7.60 – 7.41 (m, 8H), 7.19 (d, J = 8.2 Hz, 1H), 1.47 (s, 9H). <sup>13</sup>C NMR (126 MHz, CDCl<sub>3</sub>) δ 164.64, 164.42, 153.45, 150.24, 143.53, 139.72, 137.52, 136.01, 131.76, 130.52, 129.79, 129.32, 129.10, 128.54, 128.52, 128.31, 127.58, 127.40, 127.29, 127.24, 127.15, 126.97, 126.82, 126.27, 125.63, 124.90, 124.08, 123.94, 123.12, 122.94, 122.74, 120.94, 77.28, 77.02, 76.77, 35.08, 31.44, -0.00. MALDI-TOF MS (mass m/z): calcd for C<sub>45</sub>H<sub>34</sub>N<sub>4</sub>O, 646.2733; found, 647.2812 [M + H]<sup>+</sup>.

**Synthesis of 2-(4'-(3,6-di-*tert*-butyl-9*H*-carbazol-9-yl)-[1,1'-biphenyl]-4-yl)-5-phenyl-1,3,4-oxadiazole (tPCZDPO):**

M4 (3.84 g, 6.64 mmol), M3 (2.00 g, 6.64 mmol), potassium carbonate (1.37 g, 9.91 mmol), tetrahydrofuran (50 mL) and deionized water (10 mL), with Pd(PPh<sub>3</sub>)<sub>4</sub> (0.23 g, 0.20 mmol) acting as catalyst was refluxed at 70 °C for 24 h under nitrogen. After the mixture was cooled down, 40 mL deionized water was added to the resulting solution and the mixture was extracted with dichloromethane for several times. The organic phase was dried over anhydrous magnesium sulphate. After filtration and solvent evaporation, the given residue was purified through silica gel column chromatography using ethyl petroleum ether/dichloromethane as eluent to give the product as white solid (3.01 g, 79.0 %). <sup>1</sup>H NMR (500 MHz, Chloroform-*d*) δ 8.33 – 8.25 (m, 2H), 8.22 – 8.12 (m, 4H), 7.88 (d, *J* = 7.7 Hz, 4H), 7.74 – 7.65 (m, 2H), 7.62 – 7.53 (m, 3H), 7.49 (dd, *J* = 8.6, 1.9 Hz, 2H), 7.43 (d, *J* = 8.6 Hz, 2H), 1.48 (s, 18H). <sup>13</sup>C NMR (126 MHz, Chloroform-*d*) δ 164.61 , 143.49 , 143.05 , 138.99 , 138.25 , 138.11 , 131.74 , 129.08 , 128.42 , 127.61 , 127.50 , 126.95 , 123.90 , 123.65 , 123.49 , 122.87 , 116.28 , 109.18 , 34.72 , 31.98. MALDI-TOF MS (mass *m/z*): calcd for C<sub>40</sub>H<sub>37</sub>N<sub>3</sub>O, 575.2937; found, 575.2938 [M]<sup>+</sup>.

### SI-3 Supporting data

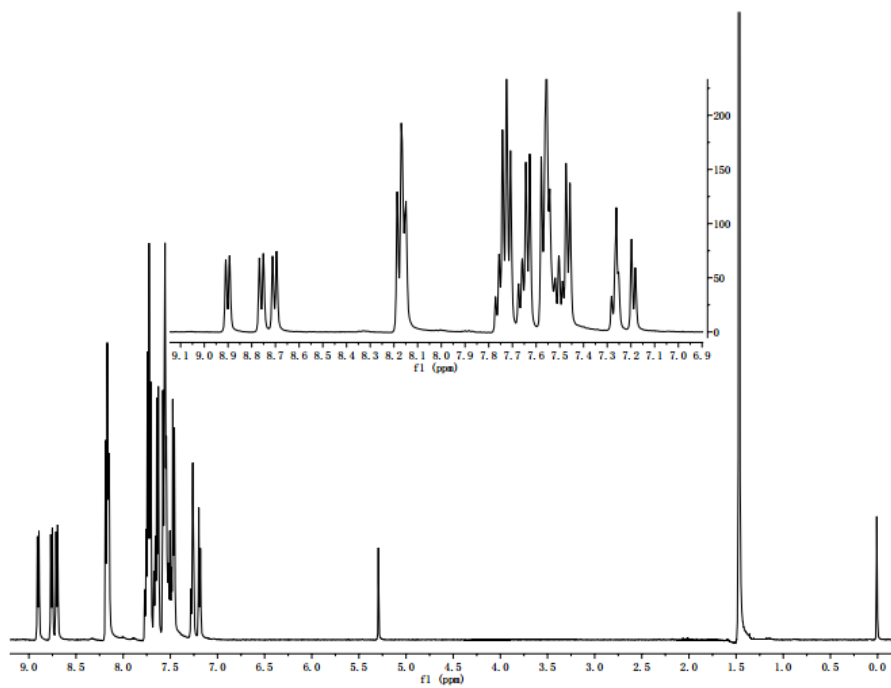

**Figure S1.**  $^1\text{H}$  NMR spectrums of tPPIDPO in  $\text{CDCl}_3$ .

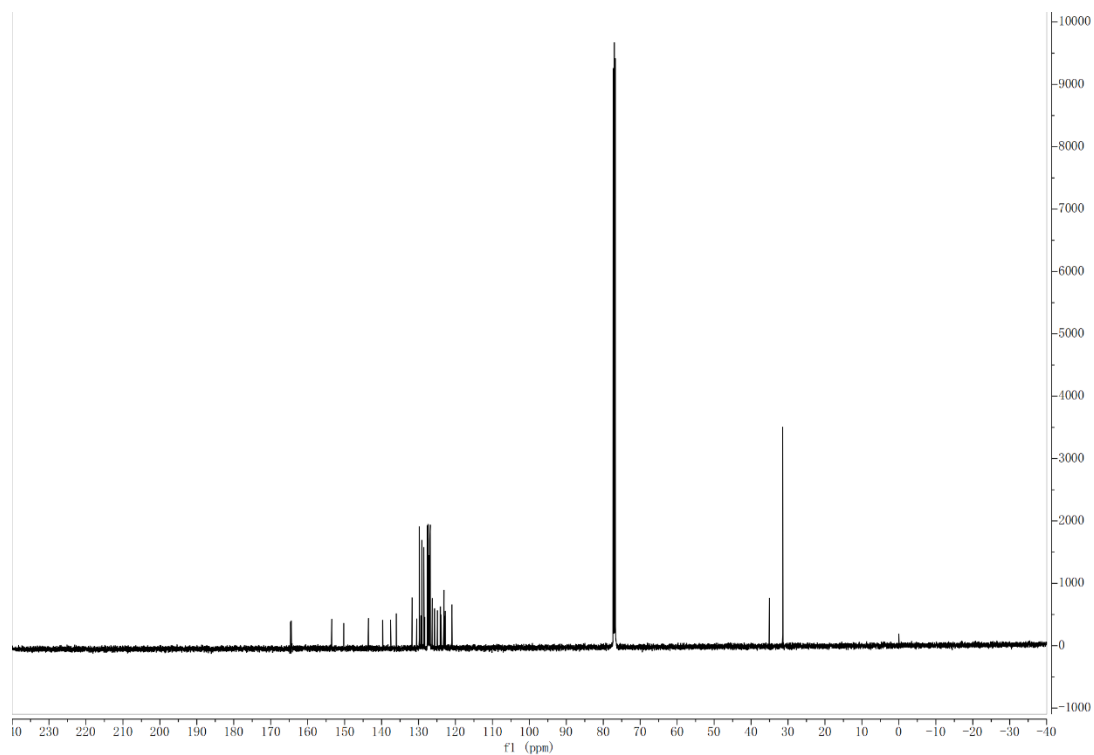

**Figure S2.**  $^{13}\text{C}$  NMR spectrums of tPPIDPO in  $\text{CDCl}_3$ .

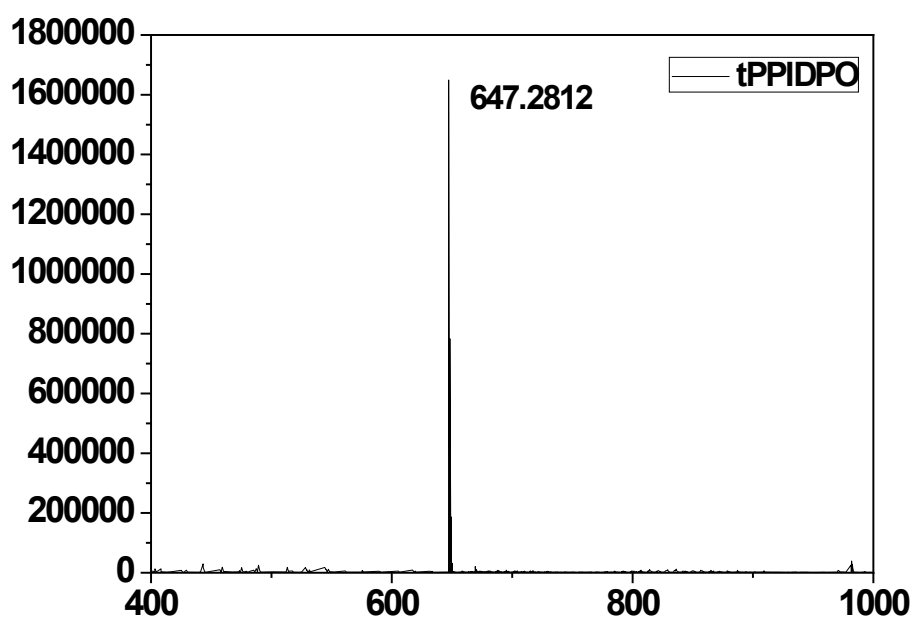

Figure S3. Mass Spectrum  $[M + H]^+$  of tPPIDPO.

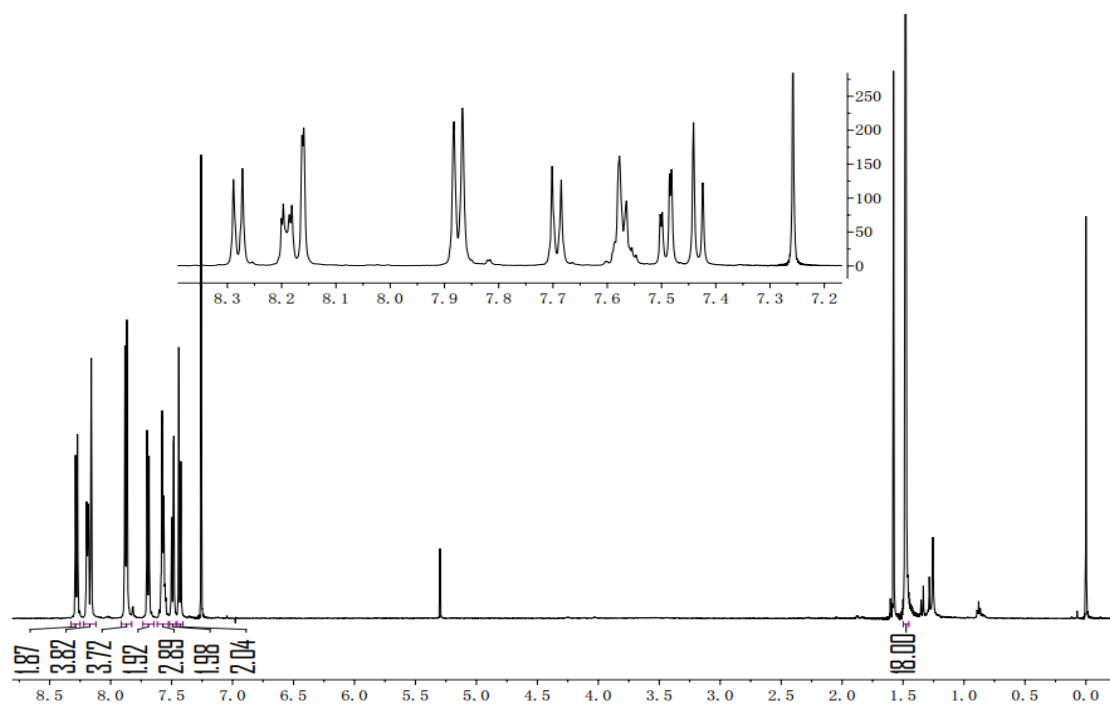

Figure S4.  $^1\text{H}$  NMR spectrums of tPCZDPO in  $\text{CDCl}_3$ .

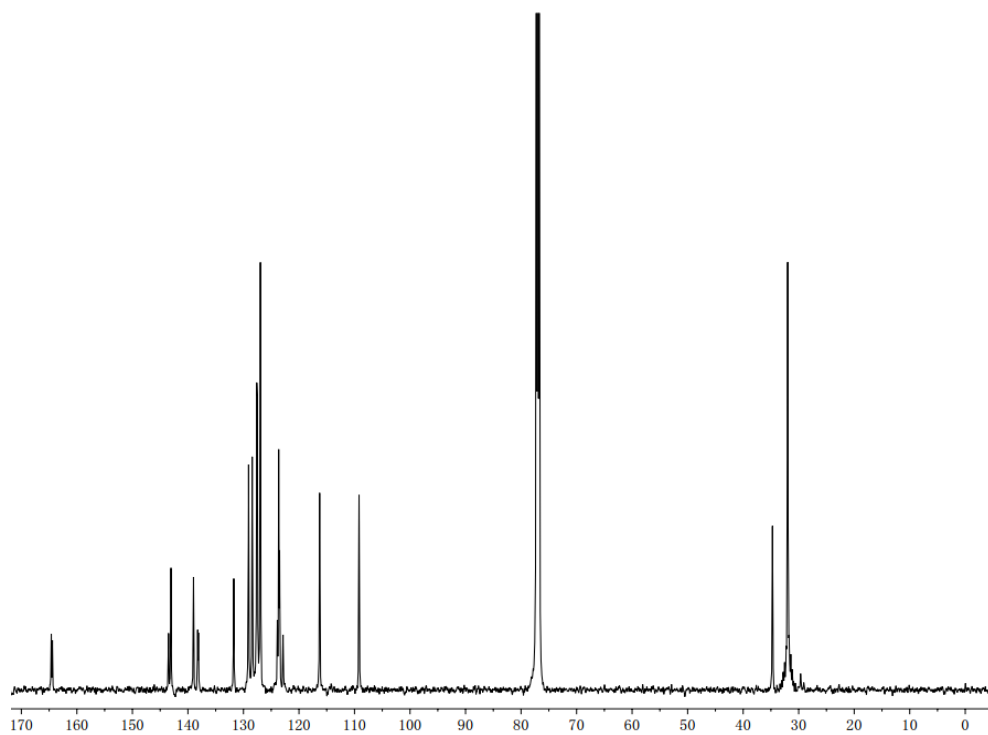

**Figure S5.**  $^{13}\text{C}$  NMR spectrums of tPCZDPO in  $\text{CDCl}_3$ .

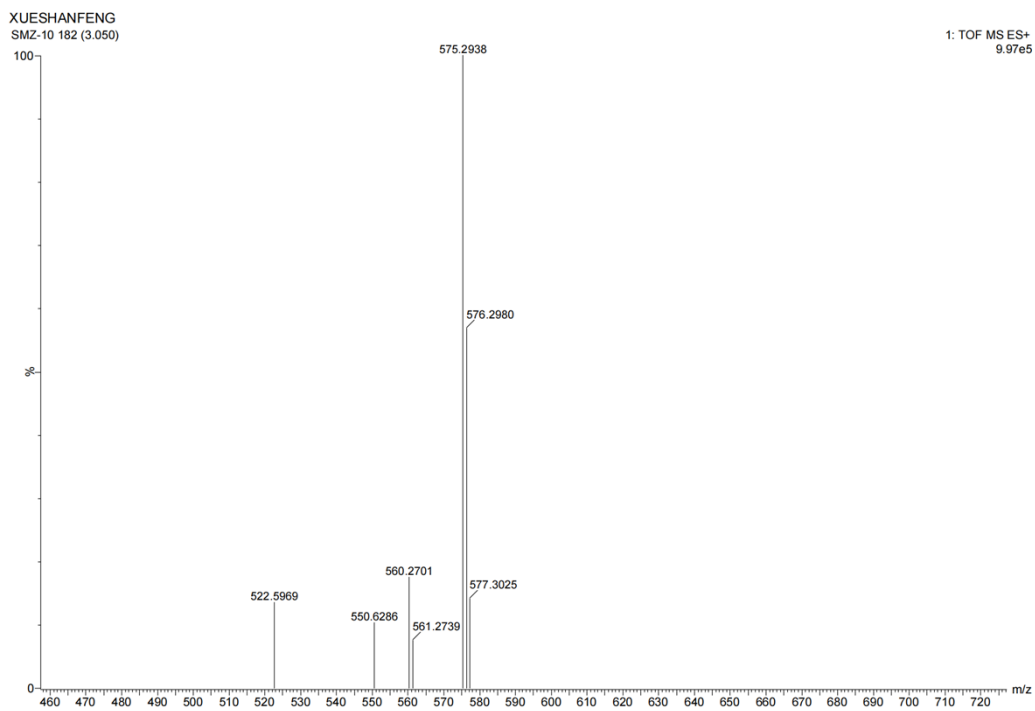

**Figure S6.** Mass Spectrum  $[\text{M}]^+$  of tPCZDPO.



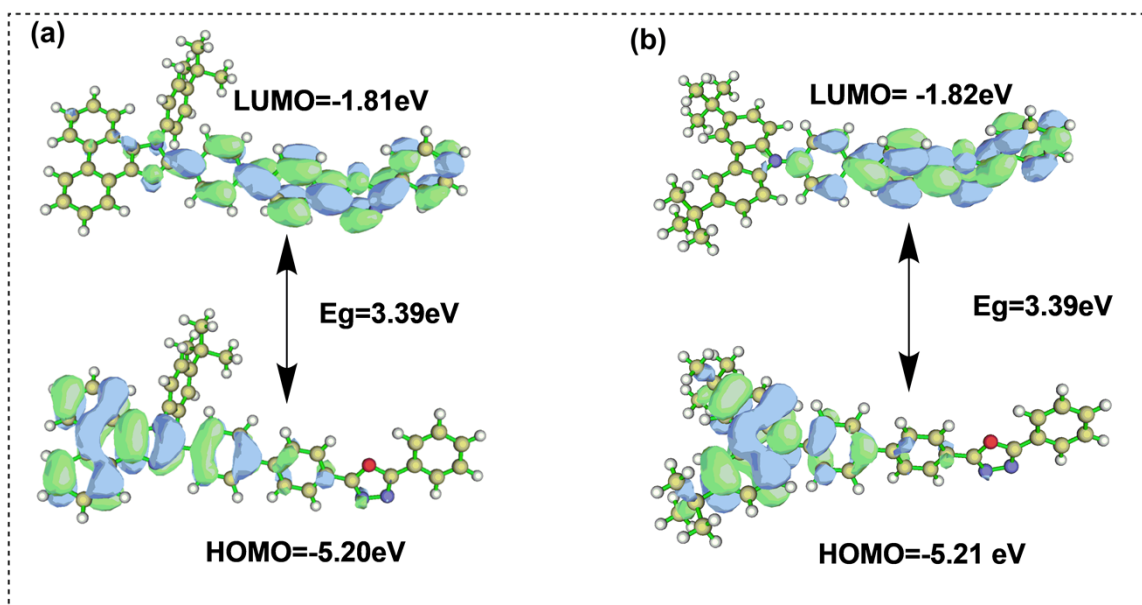

Figure S7. The Frontier Molecular Orbital (FMO) of a) tPPIDPO and b) tPCZDPO.

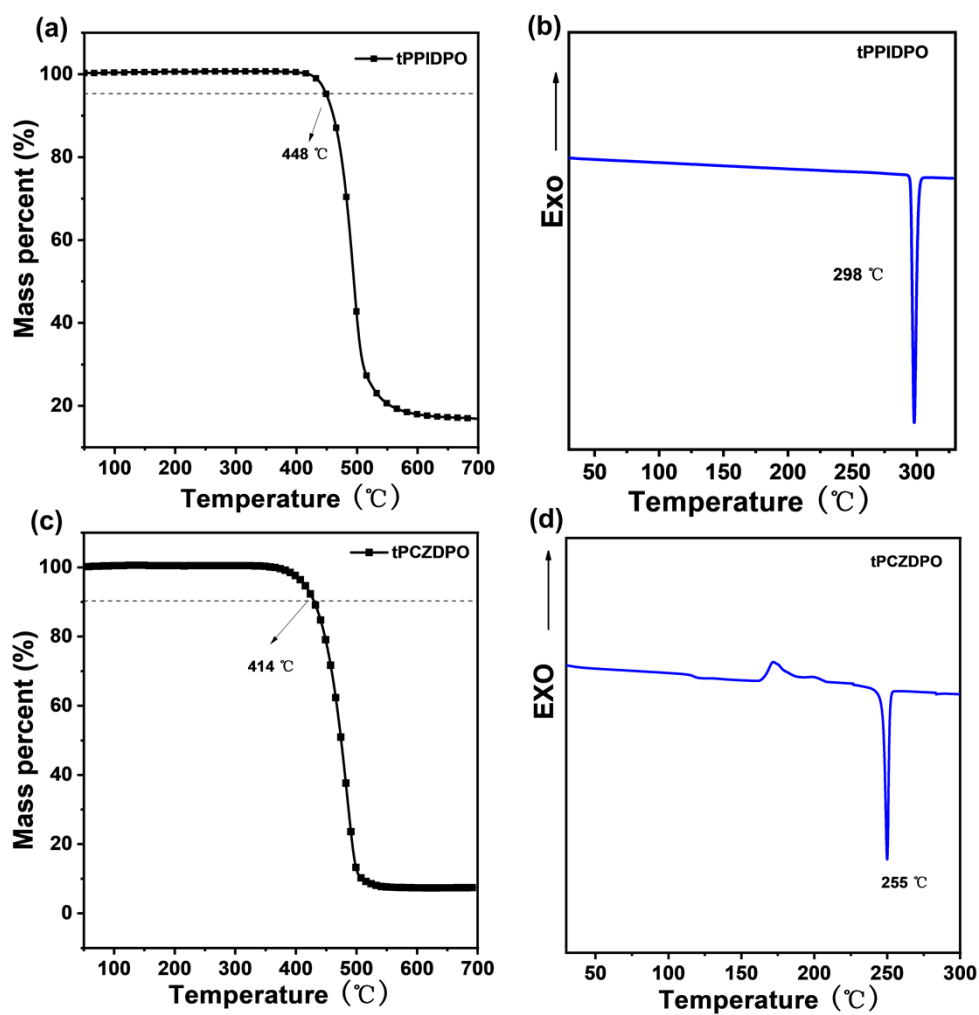

Figure S8. The TGA and DSC graphs of tPPIDPO and tPCZDPO.

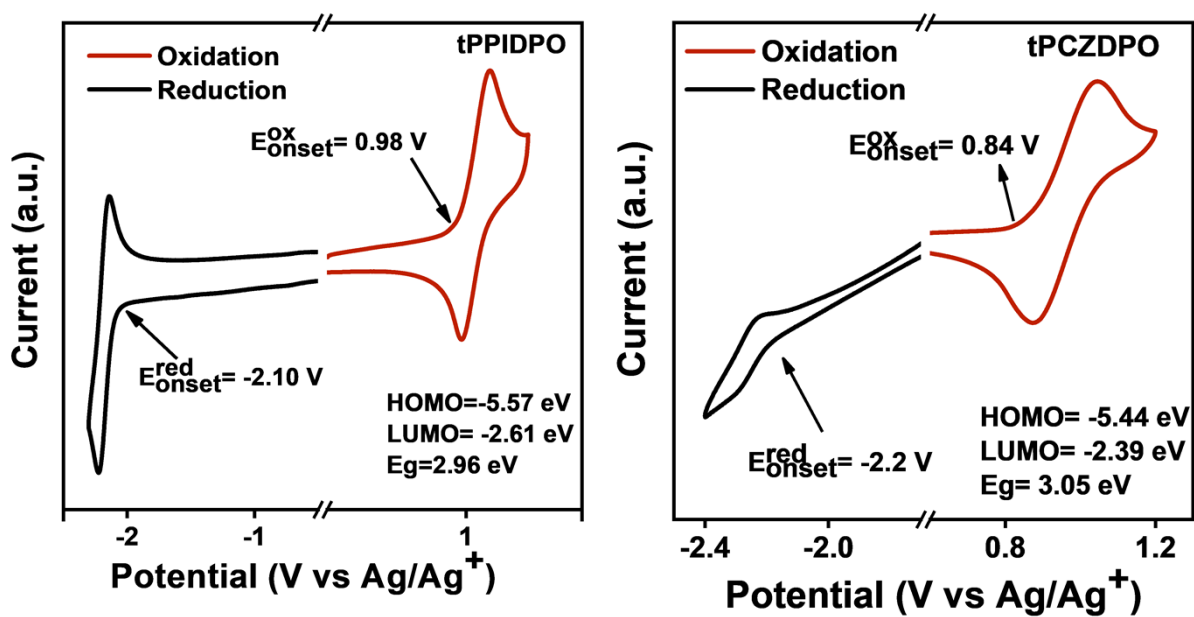

Figure S9. Electrochemical curves of tPPIDPO and tPCZDPO.

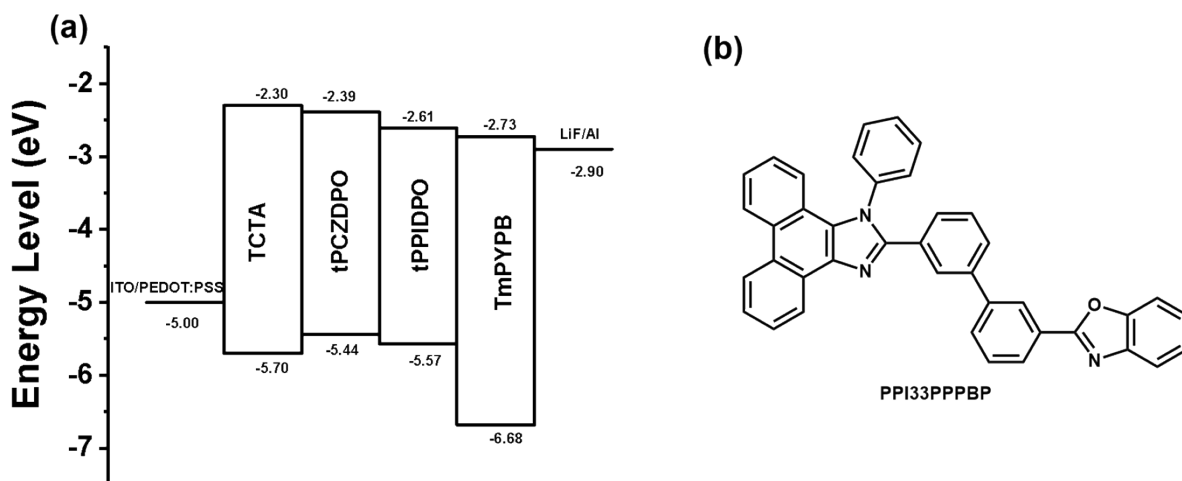

Figure S10. (a) The nondoped device energy level structure diagram. (b) Structural formula of the host PPI33PPPBP.

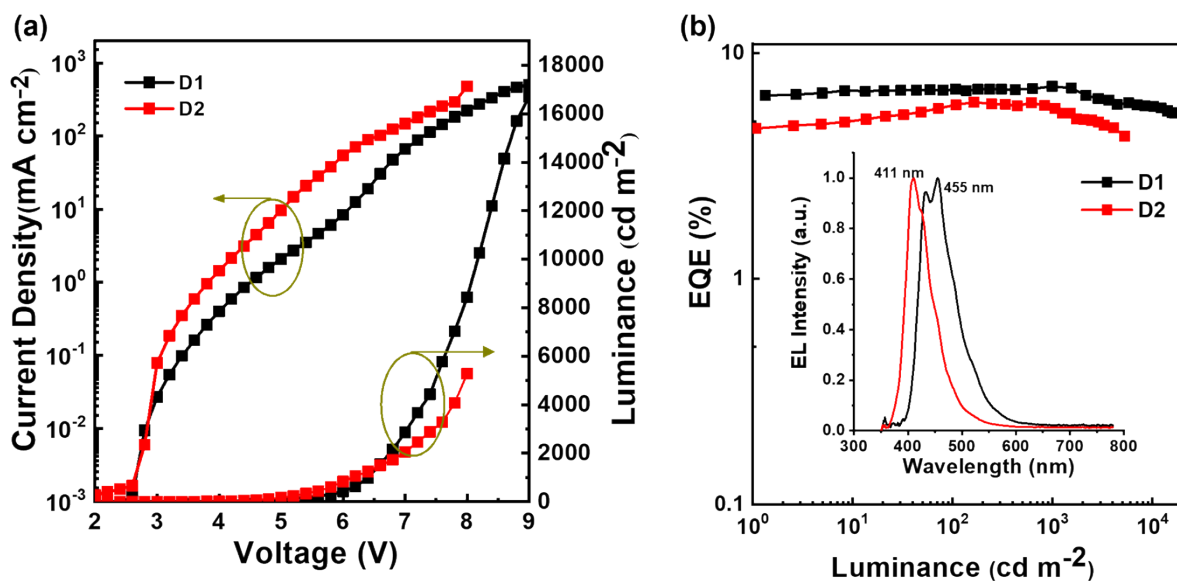

**Figure S11.** a) Current density-voltage-brightness curves; b) EQE-luminance curves and electroluminescence spectrum of the doped devices N1 and N2.

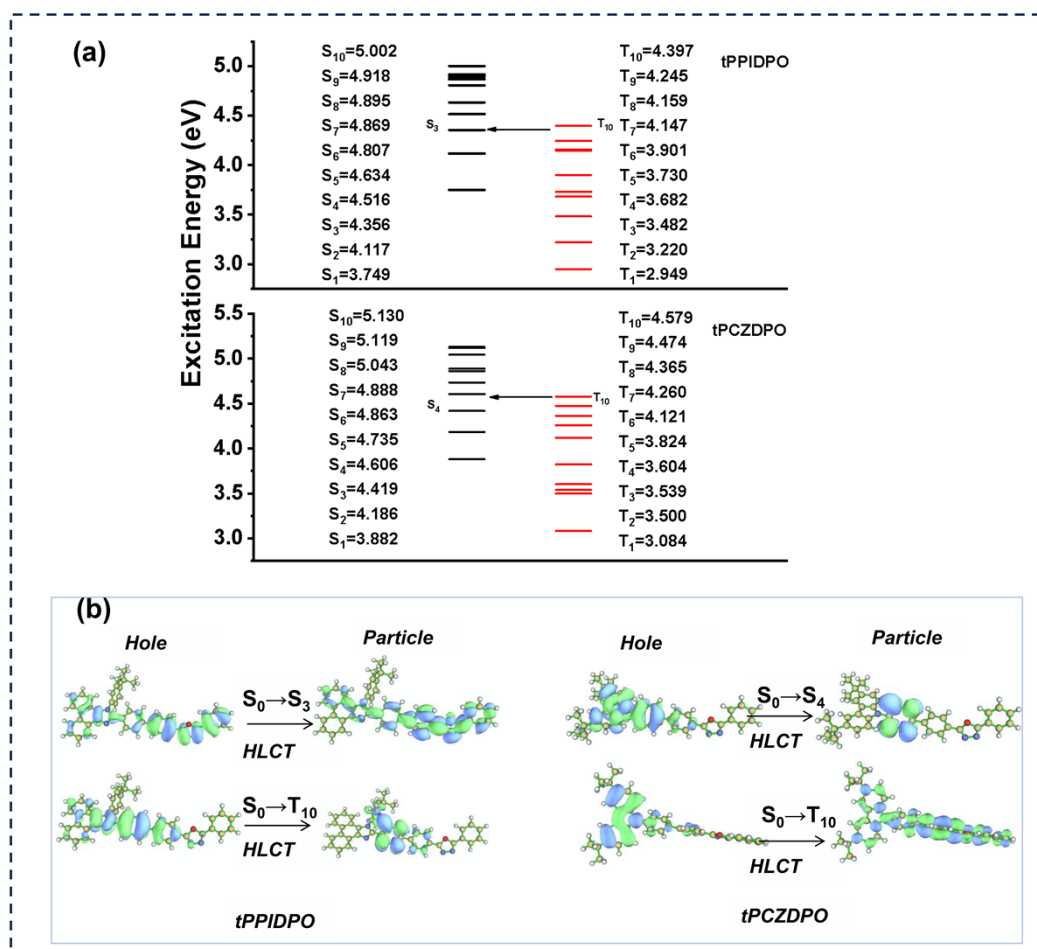

**Figure S12** (a) Energy level distribution according to NTOs, (b) the orbital electron cloud distribution of the RISC.

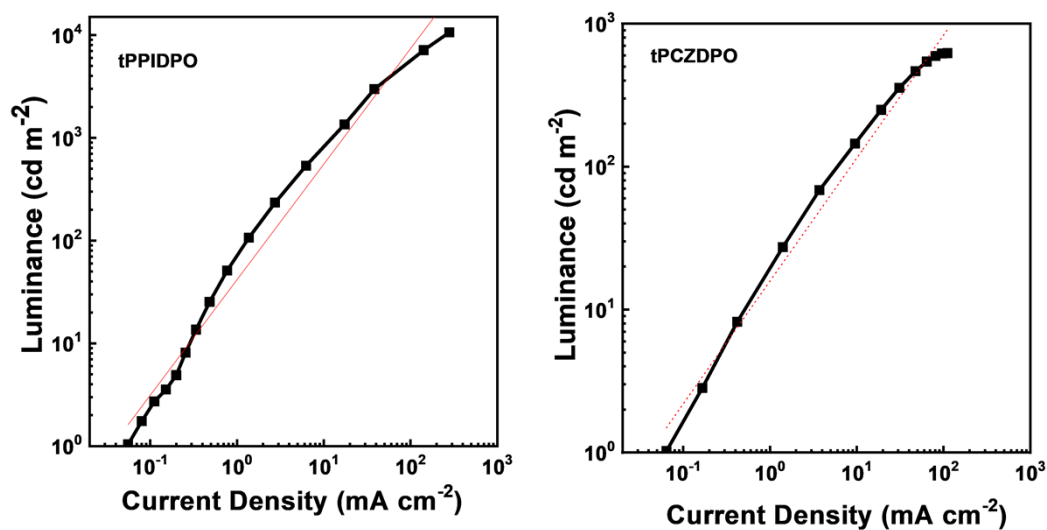

Figure S13. Luminance-current density curves.

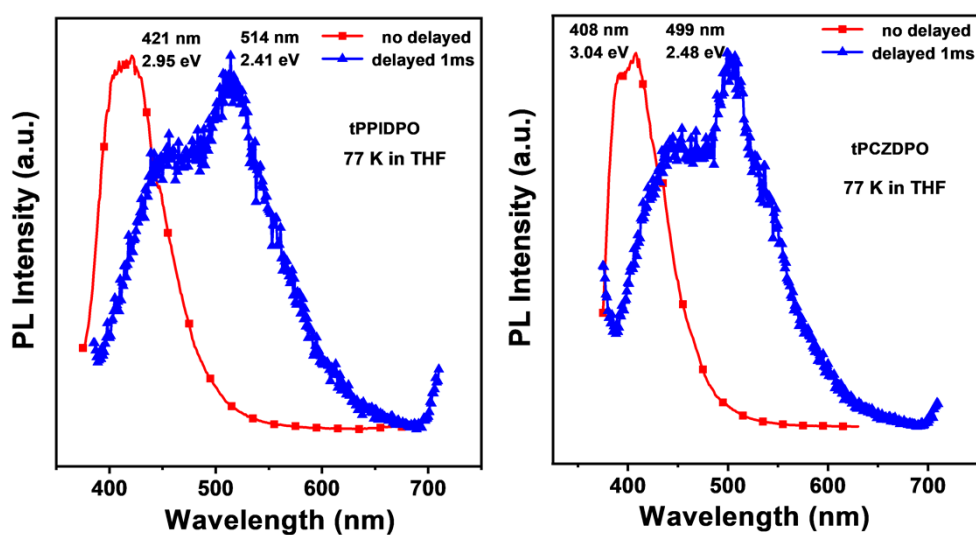

Figure S14. Fluorescence/phosphorescence emission spectrum at 77K in THF.

Table S1. The single crystal data of tPPIDPO.

| Compound         | tPPIDPO                                          |
|------------------|--------------------------------------------------|
| Chemical formula | C <sub>45</sub> H <sub>25</sub> N <sub>4</sub> O |
| Formula weight   | 637.69                                           |
| Crystal system   | triclinic                                        |
| <i>a</i> /Å      | 11.6368(17)                                      |
| <i>b</i> /Å      | b=12.0109(11)                                    |

|                                             |                                                                        |
|---------------------------------------------|------------------------------------------------------------------------|
| $c/\text{Å}$                                | $c=14.2329(10)$                                                        |
| $\alpha/^\circ$                             | 88.098(10)                                                             |
| $\beta/^\circ$                              | 69.559(11)                                                             |
| $\gamma/^\circ$                             | 66.331(11)                                                             |
| Unit cell volume/ $\text{Å}^3$              | 1693.9(8)                                                              |
| Temperature/K                               | 100 K                                                                  |
| Space group                                 | P -1                                                                   |
| Z                                           | 2                                                                      |
| Density (calculated) / $\text{g cm}^{-3}$   | 1.250                                                                  |
| F(000)                                      | 662.0                                                                  |
| Theta range for data collection             | 2.12 to 24.84                                                          |
| Index ranges                                | -11 $\leq h \leq$ 13,<br>-14 $\leq k \leq$ 14,<br>-16 $\leq l \leq$ 15 |
| Reflections measured                        | 8188                                                                   |
| Independent reflections                     | 1488                                                                   |
| $R_{int}$                                   | 0.0596                                                                 |
| Completeness to theta = 72.13 $^\circ$      | 0.997                                                                  |
| Absorption correction                       | 0.076                                                                  |
| Max. and min. transmission                  | 0.989 and 0.980                                                        |
| Data / restraints / parameters              | 5867 / 30 / 463                                                        |
| Goodness-of-fit on $F^2$                    | 1.049                                                                  |
| Final $R_I$ values ( $I > 2\sigma(I)$ )     | 0.0821                                                                 |
| Final $wR(F^2)$ values ( $I > 2\sigma(I)$ ) | 0.1726                                                                 |
| Final $R_I$ values (all data)               | 0.1488                                                                 |
| Final $wR(F^2)$ values (all data)           | 0.1959                                                                 |
| CCDC number                                 | 1922590                                                                |

**Table S2.** The single crystal data of tPCZDPO.

| Compound         | tPCZDPO    |
|------------------|------------|
| Chemical formula | C40H37N3O  |
| Formula weight   | 575.73     |
| Crystal system   | monoclinic |

|                                             |                                                                              |
|---------------------------------------------|------------------------------------------------------------------------------|
| $a/\text{\AA}$                              | 26.080(11)                                                                   |
| $b/\text{\AA}$                              | $b=10.902(5)$                                                                |
| $c/\text{\AA}$                              | $c=11.347(5)$                                                                |
| $\alpha/^\circ$                             | 90                                                                           |
| $\beta/^\circ$                              | 100.628(8)                                                                   |
| $\gamma/^\circ$                             | 90                                                                           |
| Unit cell volume/ $\text{\AA}^3$            | 3172(2)                                                                      |
| Temperature/K                               | 296 K                                                                        |
| Space group                                 | P 21/c                                                                       |
| Z                                           | 4                                                                            |
| Density (calculated) /g cm <sup>-3</sup>    | 1.206                                                                        |
| F(000)                                      | 1224                                                                         |
| Theta range for data collection             | 2.38 to 24.997                                                               |
| Index ranges                                | -29 $\leq$ h $\leq$ 30,<br>-12 $\leq$ k $\leq$ 10,<br>-13 $\leq$ l $\leq$ 13 |
| Reflections measured                        | 1915                                                                         |
| Independent reflections                     | 1488                                                                         |
| $R_{int}$                                   | 0.1132                                                                       |
| Completeness to theta = 72.13 $^\circ$      | 0.997                                                                        |
| Absorption correction                       | 0                                                                            |
| Max. and min. transmission                  | 0.981 and 0.997                                                              |
| Data / restraints / parameters              | 5563 /0/ 403                                                                 |
| Goodness-of-fit on $F^2$                    | 1.049                                                                        |
| Final $R_I$ values ( $I > 2\sigma(I)$ )     | 0.0856                                                                       |
| Final $wR(F^2)$ values ( $I > 2\sigma(I)$ ) | 0.1895                                                                       |
| Final $R_I$ values (all data)               | 0.1787                                                                       |
| Final $wR(F^2)$ values (all data)           | 0.2226                                                                       |
| CCDC number                                 | 2281523                                                                      |

---

**Table S3.** Thermal performance, photophysical and electrochemical data of tPPIDPO and tPCZDPO.

| Compound | $\lambda_{abs}$ <sup>a)</sup> [nm]<br>THF/film | $\lambda_{PL}$ <sup>b)</sup> [nm]<br>THF/film | $T_m/T_d$ <sup>c)</sup><br>[°C] | HOMO/<br>LUMO <sup>d)</sup><br>[eV] | $E_g$ <sup>e)</sup><br>[eV] | $\Phi_{PL}$ <sup>f)</sup> [%]<br>THF/film | $\tau$ <sup>g)</sup><br>film<br>[ns] |
|----------|------------------------------------------------|-----------------------------------------------|---------------------------------|-------------------------------------|-----------------------------|-------------------------------------------|--------------------------------------|
| tPPIDPO  | 365/371                                        | 449/471                                       | 298/448                         | -5.57/-2.61                         | 2.96                        | 0.93/0.96                                 | 2.1                                  |
| tPCZDPO  | 347/351                                        | 441/435                                       | 255/414                         | -5.44/-2.39                         | 3.95                        | 0.77/0.76                                 | 4.1                                  |

<sup>a)</sup> UV–vis absorption and <sup>b)</sup> PL value in THF ( $10^{-5}$  M) and neat film. <sup>c)</sup> The melting temperature ( $T_m$ ) and the decomposition temperature ( $T_d$ ). <sup>d)</sup> The HOMO/LUMO values calculated from the oxidation and reduction peaks measured by CV. <sup>e)</sup> The optical band gap calculated by CV. <sup>f)</sup> The photoluminescence quantum yield in THF and neat films. <sup>g)</sup> The fluorescence lifetime in film state.

**Table S4.** Absorption and emission peaks in different solvents with different polarities of tPPIDPO and tPCZDPO.

|                 | tPPIDPO                                | tPCZDPO                                |
|-----------------|----------------------------------------|----------------------------------------|
|                 | $\lambda_{exmax}/\lambda_{emmax}$ [nm] | $\lambda_{exmax}/\lambda_{emmax}$ [nm] |
| Hexane          | 365/407                                | 346/386                                |
| Triethylamine   | 365/410                                | 346/390                                |
| Butylether      | 365/418                                | 346/405                                |
| Isopropylether  | 365/422                                | 346/414                                |
| Ethylether      | 365/436                                | 347/420                                |
| Ethylacetate    | 363/444                                | 345/438                                |
| THF             | 363/447                                | 347/445                                |
| Dichloromethane | 363/452                                | 346/458                                |
| DMF             | 363/460                                | 346/460                                |
| Acetone         | 363/459                                | 346/469                                |
| Acetonitrile    | 362/468                                | 347/494                                |

**Table S5.** PLQY of tPPIDPO and tPCZDPO in different solvents with different polarities.

|                 | tPPIDPO [%] | tPCZDPO [%] |
|-----------------|-------------|-------------|
| hexane          | 0.63        | 0.86        |
| Isopropyl ether | 0.81        | 0.83        |
| THF             | 0.93        | 0.96        |
| acetonitrile    | 0.97        | 0.81        |

**Table S6.** Relevant solvents and corresponding detailed data used to draw Stokes curve.

|                 | tPPIDPO                                          | tPCZDPO                                          |
|-----------------|--------------------------------------------------|--------------------------------------------------|
|                 | polarization factor ( <i>f</i> ) / stockes shift | polarization factor ( <i>f</i> ) / stockes shift |
| Hexane          | 0.0012/2827.235704                               | 0.0012/2994.998353                               |
| Butylether      | 0.096/3473.815298                                | 0.096/4210.376079                                |
| Isopropylether  | 0.145/3700.57781                                 | 0.145/4747.144732                                |
| Ethylether      | 0.167/4461.480457                                | 0.167/5092.210295                                |
| Ethylacetate    | 0.2/5025.686844                                  | 0.2/6070.683876                                  |
| THF             | 0.21/5176.844713                                 | 0.21/6429.823992                                 |
| Dichloromethane | 0.217/5424.315561                                | 0.217/7067.672969                                |
| Acetone         | 0.284//5761.716992                               | 0.284/7579.772484                                |
| Acetonitrile    | 0.305/6256.788025                                | 0.305/8658.818124                                |
